# Supplementary material for: Comparative study of gut microbiota in Tibetan wild asses (Equus kiang) and domestic donkeys (Equus asinus) on the Qinghai-Tibet plateau
Source: PeerJ. 2020 Jun 4;8:e9032. doi: 10.7717/peerj.9032 (PMC7276150; doi:10.7717/peerj.9032)
Supplement: Data S1 — TWAs refers to Tibetan wild asses, NPDDs refers to natural pasture domestic donkeys. [file peerj-08-9032-s012.xlsx]

## Sheet: Sheet1
Groups	AIA in faces	AIA in herbage	Dry matter digestion (%)
NPDDs	0.4863	0.2472	49.1672
	0.4776	0.2238	53.1407
	0.4813	0.2486	48.3482
	0.4833	0.2502	48.2309
	0.4755	0.2165	54.469
	0.4846	0.2637	45.584
	0.4697	0.2216	52.8209
	0.4933	0.2568	47.9424
	0.4951	0.2643	46.6168
	0.4863	0.2543	47.7072
	0.4655	0.2264	51.3641
	0.4932	0.2128	56.8532
	0.4631	0.2165	53.2498
	0.4784	0.2116	55.7692
	0.4524	0.2455	45.7339
TWAs	0.3097	0.1317	57.475
	0.3925	0.1234	68.5605
	0.3569	0.1513	57.6072
	0.3767	0.1662	55.88
	0.4148	0.1146	72.3722
	0.4463	0.2627	41.1382
	0.4532	0.1633	63.9673
	0.3766	0.1687	55.2045
	0.3831	0.1635	57.3218
	0.4362	0.1661	61.9211
	0.4166	0.2034	51.1762
	0.4268	0.1639	61.5979
	0.4773	0.1363	71.4435
	0.4661	0.2282	51.0405
	0.3756	0.1622	56.8158
